# Supplementary material
Source: HighWire-hosted journal article supplement (https://cancerpreventionresearch.aacrjournals.org/content/suppl/2011/11/15/1940-6207.CAPR-11-0309)
Supplement: CAPR_11-0309_T3.F1_PDF_233K.pdf [file CAPR_11-0309_T3.F1_PDF_233K.pdf]

**TABLE S1. Mutant frequency of the *cII* transgene in various organs of Big Blue mice chronically treated with 4-ABP or control (DMSO).**

| Treatment                            | Mouse ID | Total number of plaques<br>( <i>pfu</i> <sup>*</sup> ) | Mutant plaques | Mutant frequency<br>( $\times 10^{-5}$ ) | Average mutant<br>frequency ( $\times 10^{-5}$ ) <sup>†</sup> |
|--------------------------------------|----------|--------------------------------------------------------|----------------|------------------------------------------|---------------------------------------------------------------|
| <b>Bladder</b>                       |          |                                                        |                |                                          |                                                               |
| Control                              | 238      | 321,250                                                | 6              | 1.87                                     | 2.06 $\pm$ 0.20                                               |
|                                      | 239      | 985,000                                                | 23             | 2.34                                     |                                                               |
|                                      | 240      | 850,000                                                | 16             | 1.88                                     |                                                               |
|                                      | 241      | 436,250                                                | 9              | 2.06                                     |                                                               |
|                                      | 251      | 1,080,000                                              | 25             | 2.31                                     |                                                               |
| 4-ABP (6 Weeks)                      | 229      | 1,030,000                                              | 149            | 14.47                                    | 18.86 $\pm$ 4.77                                              |
|                                      | 230      | 1,050,000                                              | 198            | 18.86                                    |                                                               |
|                                      | 231      | 1,005,000                                              | 184            | 18.31                                    |                                                               |
|                                      | 232      | 710,000                                                | 205            | 28.87                                    |                                                               |
|                                      | 220      | 880,000                                                | 199            | 22.61                                    |                                                               |
| 4-ABP (6 Weeks) + Recovery (6 Weeks) | 221      | 995,000                                                | 259            | 26.03                                    | 17.20 $\pm$ 4.88                                              |
|                                      | 222      | 1,255,000                                              | 202            | 16.10                                    |                                                               |
|                                      | 223      | 1,030,000                                              | 249            | 24.17                                    |                                                               |
|                                      | 247      | 1,330,000                                              | 172            | 12.93                                    |                                                               |
|                                      | 248      | 1,070,000                                              | 184            | 17.20                                    |                                                               |
| <b>Liver</b>                         |          |                                                        |                |                                          |                                                               |
| Control                              | 238      | 540,000                                                | 11             | 2.04                                     | 2.04 $\pm$ 0.56                                               |
|                                      | 239      | 1,940,000                                              | 40             | 2.06                                     |                                                               |
|                                      | 240      | 455,000                                                | 15             | 3.30                                     |                                                               |
|                                      | 241      | 2,095,000                                              | 42             | 2.00                                     |                                                               |

|                                      |     |           |    |      |             |
|--------------------------------------|-----|-----------|----|------|-------------|
|                                      | 251 | 930,000   | 15 | 1.61 |             |
| 4-ABP (6 Weeks)                      | 229 | 1,170,000 | 28 | 2.39 | 4.54 ± 1.08 |
|                                      | 230 | 722,500   | 19 | 2.63 |             |
|                                      | 231 | 1,095,000 | 52 | 4.75 |             |
|                                      | 232 | 545,000   | 27 | 4.95 |             |
|                                      | 220 | 858,750   | 39 | 4.54 |             |
| 4-ABP (6 Weeks) + Recovery (6 Weeks) | 221 | 995,000   | 66 | 6.63 | 4.62 ± 0.98 |
|                                      | 222 | 1,215,000 | 55 | 4.53 |             |
|                                      | 223 | 1,000,000 | 49 | 4.90 |             |
|                                      | 247 | 1,170,000 | 54 | 4.62 |             |
|                                      | 248 | 1,100,000 | 39 | 3.55 |             |
| <b>Kidney</b>                        |     |           |    |      |             |
| Control                              | 238 | 840,000   | 40 | 4.76 | 2.59 ± 1.22 |
|                                      | 239 | 1,080,000 | 28 | 2.59 |             |
|                                      | 240 | 1,045,000 | 41 | 3.92 |             |
|                                      | 241 | 1,280,000 | 15 | 1.17 |             |
|                                      | 251 | 566,250   | 14 | 2.47 |             |
| 4-ABP (6 Weeks)                      | 229 | 1,330,000 | 33 | 2.48 | 3.64 ± 0.93 |
|                                      | 230 | 880,000   | 34 | 3.86 |             |
|                                      | 231 | 1,565,000 | 57 | 3.64 |             |
|                                      | 232 | 785,000   | 41 | 5.22 |             |
|                                      | 220 | 1,095,000 | 31 | 2.83 |             |
| 4-ABP (6 Weeks) + Recovery (6 Weeks) | 221 | 1,195,000 | 62 | 5.19 | 6.57 ± 1.94 |
|                                      | 222 | 1,195,000 | 31 | 2.59 |             |
|                                      | 223 | 820,000   | 59 | 7.20 |             |
|                                      | 247 | 1,150,000 | 96 | 8.35 |             |
|                                      | 248 | 700,000   | 46 | 6.57 |             |

| <b>Lung</b>                                                |     |           |     |       |             |
|------------------------------------------------------------|-----|-----------|-----|-------|-------------|
| Control                                                    | 238 | 1,200,000 | 43  | 3.58  | 3.58 ± 0.33 |
|                                                            | 239 | 1,045,000 | 37  | 3.54  |             |
|                                                            | 240 | 1,035,000 | 29  | 2.80  |             |
|                                                            | 241 | 820,000   | 30  | 3.66  |             |
|                                                            | 251 | 1,155,000 | 43  | 3.72  |             |
| 4-ABP <sup>(6 Weeks)</sup>                                 | 229 | 855,000   | 38  | 4.44  | 3.07 ± 0.69 |
|                                                            | 230 | 1,030,000 | 35  | 3.40  |             |
|                                                            | 231 | 1,555,000 | 37  | 2.38  |             |
|                                                            | 232 | 1,165,000 | 32  | 2.75  |             |
|                                                            | 220 | 1,270,000 | 39  | 3.07  |             |
| 4-ABP <sup>(6 Weeks)</sup> + Recovery <sup>(6 Weeks)</sup> | 221 | 1,720,000 | 31  | 1.80  | 2.90 ± 4.18 |
|                                                            | 222 | 1,740,000 | 32  | 1.84  |             |
|                                                            | 223 | 1,310,000 | 38  | 2.90  |             |
|                                                            | 247 | 935,000   | 122 | 13.05 |             |
|                                                            | 248 | 483,750   | 17  | 3.51  |             |
| <b>Stomach</b>                                             |     |           |     |       |             |
| Control                                                    | 238 | 287,500   | 5   | 1.74  | 2.44 ± 0.84 |
|                                                            | 239 | 302,500   | 12  | 3.97  |             |
|                                                            | 240 | 615,000   | 15  | 2.44  |             |
|                                                            | 241 | 895,000   | 20  | 2.23  |             |
|                                                            | 251 | 410,000   | 15  | 3.66  |             |
| 4-ABP <sup>(6 Weeks)</sup>                                 | 229 | 180,000   | 11  | 6.11  | 3.96 ± 1.68 |
|                                                            | 230 | 675,000   | 11  | 1.63  |             |
|                                                            | 231 | 530,000   | 21  | 3.96  |             |
|                                                            | 232 | 485,000   | 14  | 2.89  |             |

|                                                            |     |         |    |      |             |
|------------------------------------------------------------|-----|---------|----|------|-------------|
|                                                            | 220 | 323,750 | 19 | 5.87 |             |
| 4-ABP <sup>(6 Weeks)</sup> + Recovery <sup>(6 Weeks)</sup> | 221 | 455,000 | 18 | 3.96 | 3.39 ± 1.30 |
|                                                            | 222 | 945,000 | 31 | 3.28 |             |
|                                                            | 223 | 805,000 | 23 | 2.86 |             |
|                                                            | 247 | 885,000 | 30 | 3.39 |             |
|                                                            | 248 | 805,000 | 53 | 6.58 |             |

Male adult Big Blue transgenic mice received weekly intraperitoneal injection of 4-ABP or control DMSO for a duration of 6 consecutive weeks, after which they were sacrificed either immediately, or after a 'Recovery' period of 6 weeks.

\* Plaque forming unit

† Results are expressed as median ± 95% CIs.

**TABLE S2. Types of mutations in the *cII* transgene in bladder of Big Blue mice chronically treated with 4-ABP or DMSO control.**

| Mutation type      |          | 4-ABP                    | Control     | 4-ABP*      | Control*   |          |
|--------------------|----------|--------------------------|-------------|-------------|------------|----------|
| Single mutation    |          | 143 (99.3%) <sup>†</sup> | 138 (98.6%) | 130 (92.2%) | 100 (98.0) |          |
| Multiple mutations |          | 1 (0.7%)                 | 2 (1.4%)    | 1 (0.8%)    | 2 (2.0)    |          |
| Base substitution  | Single   | 128 (88.9%)              | 105 (75.0%) | 116 (88.5%) | 80 (78.4%) |          |
|                    | Tandem   | AG→CT                    | 0 (0%)      | 1 (0.7%)    | 0 (0%)     | 1 (1.0%) |
|                    |          | TG→AT                    | 1 (0.7%)    | 0 (0%)      | 1 (0.8%)   | 0 (0%)   |
|                    |          | CT→TG                    | 1 (0.7%)    | 0 (0%)      | 1 (0.8%)   | 0 (0%)   |
|                    | Multiple | G→T and (T) Ins.         | 1 (0.7%)    | 0 (0%)      | 1 (0.8%)   | 0 (0%)   |
|                    |          | G→A and G→A              | 0 (0%)      | 1 (0.7%)    | 0 (0%)     | 1 (1.0%) |
|                    |          | T→A and C→T              | 0 (0%)      | 1 (0.7%)    | 0 (0%)     | 1 (1.0%) |
| Deletion           | Single   | 11 (7.6%)                | 16 (11.4%)  | 10 (7.6%)   | 13 (12.7%) |          |
|                    | Multiple | 0 (0%)                   | 1 (0.7%)    | 0 (0%)      | 1 (1.0%)   |          |
| Insertion          | Single   | 1 (0.7%)                 | 15 (10.7%)  | 1 (0.8%)    | 5 (4.9%)   |          |
|                    | Multiple | 1 (0.7%)                 | 0 (0%)      | 1 (0.8%)    | 0 (0%)     |          |

Male adult Big Blue transgenic mice received weekly intraperitoneal injection of 4-ABP or control DMSO for a duration of 6 consecutive weeks, after which they were sacrificed either immediately, or after a 'Recovery' period of 6 weeks.

\* Adjusted after exclusion of sibling mutations that occurred more than once at the same nucleotide position in the same animal.

† Percentage values are indicated in the brackets.

Ins. = Insertion

Del. = Deletion

**TABLE S3. Comparative mutation spectra of the *cII* transgene in bladder of Big Blue mice chronically treated with 4-ABP or DMSO control.**

| Mutation type | Number of Mutations |         |         |          | % Mutations |         |             |             | Absolute Mutant Frequency ( $\times 10^{-5}$ ) |         |             |             |
|---------------|---------------------|---------|---------|----------|-------------|---------|-------------|-------------|------------------------------------------------|---------|-------------|-------------|
|               | 4-ABP               | Control | 4-ABP*  | Control* | 4-ABP       | Control | 4-ABP*      | Control*    | 4-ABP                                          | Control | 4-ABP*      | Control*    |
| G:C→C:G       | 17                  | 3       | 16 (8)  | 3        | 11.6        | 2.1     | 11.9 (6.0)  | 2.9         | 2.18                                           | 0.04    | 2.05 (1.03) | 0.04        |
| G:C→T:A       | 62                  | 13      | 59 (14) | 12 (4)   | 42.2        | 9.1     | 44.0 (10.4) | 11.4 (3.8)  | 7.95                                           | 0.19    | 7.56 (1.79) | 0.17 (0.06) |
| G:C→A:T       | 36                  | 65      | 31 (14) | 44 (35)  | 24.5        | 45.5    | 23.1 (10.4) | 41.9 (33.3) | 4.62                                           | 0.94    | 3.97 (1.79) | 0.63 (0.50) |
| A:T→T:A       | 7                   | 10      | 5       | 10       | 4.8         | 7.0     | 3.7         | 9.5         | 0.90                                           | 0.14    | 0.64        | 0.14        |
| A:T→G:C       | 7                   | 8       | 7       | 8        | 4.8         | 5.6     | 5.2         | 7.6         | 0.90                                           | 0.12    | 0.90        | 0.11        |
| A:T→C:G       | 5                   | 12      | 4       | 9        | 3.4         | 8.4     | 3.0         | 8.6         | 0.64                                           | 0.17    | 0.51        | 0.13        |
| Del.          | 11                  | 17      | 10 (2)  | 14       | 7.5         | 11.9    | 7.5 (1.5)   | 13.3        | 1.41                                           | 0.24    | 1.28 (0.26) | 0.20        |
| Ins.          | 2                   | 15      | 2       | 5        | 1.4         | 10.5    | 1.5         | 4.8         | 0.26                                           | 0.22    | 0.26        | 0.07        |

Male adult Big Blue transgenic mice received weekly intraperitoneal injection of 4-ABP or control DMSO for a duration of 6 consecutive weeks, after which they were sacrificed either immediately, or after a 'Recovery' period of 6 weeks.

\* Adjusted after exclusion of sibling mutations that occurred more than once at the same nucleotide position in the same animal.

† Mutations occurring specifically at CpG dinucleotides are indicated in the brackets.

‡

Ins. = Insertion

Del. = Deletion



## Figure S1

### **Distribution of mutations in the *cII* transgene in bladder of 4-ABP-treated mice and controls.**

The spectra of mutations in the *cII* transgene in 4-ABP-treated mice and controls were established by DNA sequencing of mutants from bladder DNA of carcinogen-treated mice and controls, as described in 'Materials and Methods'. The 4-ABP-induced mutations are indicated above the reference *cII* sequence, whereas the control mutations are shown below the reference *cII* sequence.

5'-CpG-containing sequences are indicated by asterisks in control.

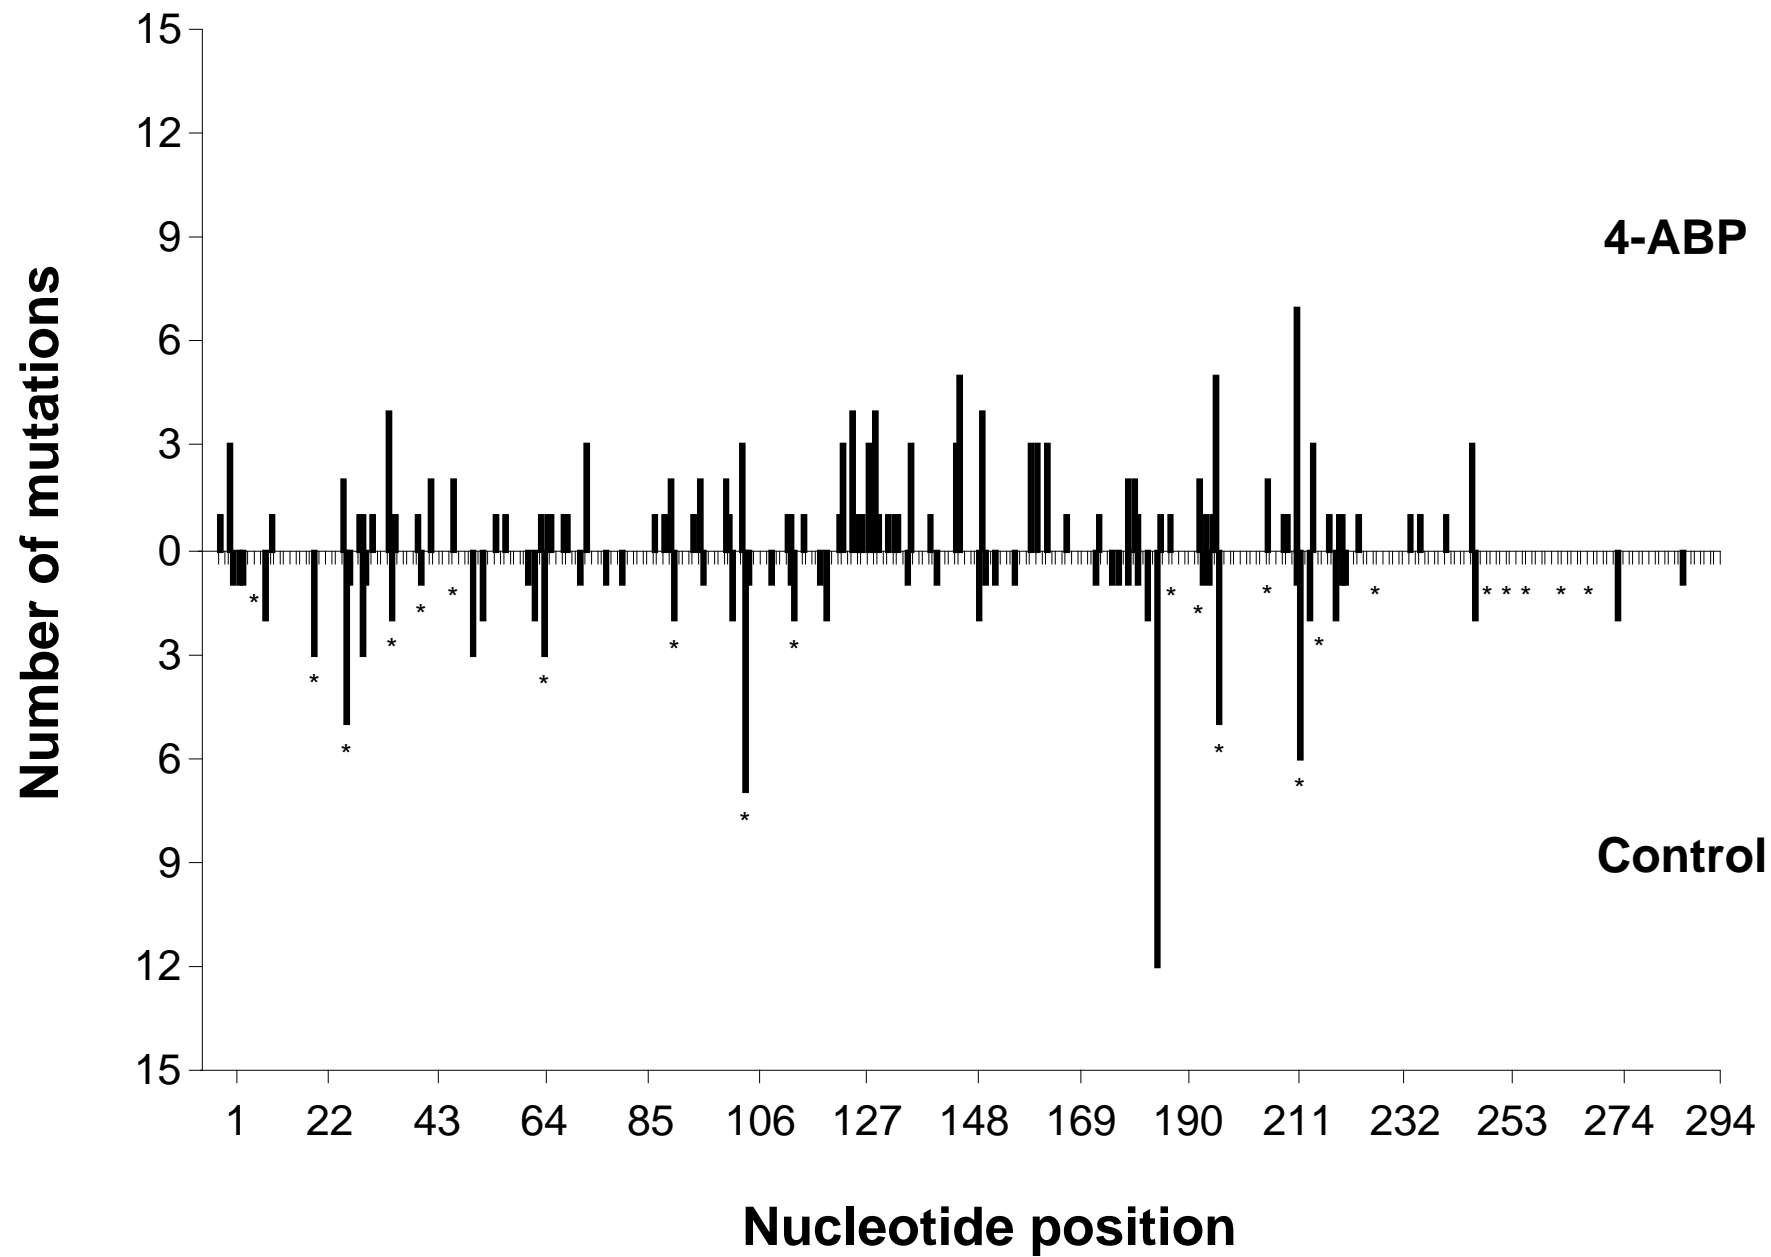

Fig. S1
